# Supplementary material
Source: MDPI journal article supplement (https://www.mdpi.com/2073-4344/12/12/1672)
Supplement: s1 [file s1]

## Supporting Information

### **Insight into the effect of anionic–anionic co-doping on BaTiO<sub>3</sub> for visible light photocatalytic water splitting: A first principles hybrid computational study**

Souraya Goumri-Said<sup>1</sup> and Mohammed Benali Kanoun<sup>2</sup>

<sup>1</sup>*College of Science, Physics Department, Alfaisal University, P.O. Box 50927, Riyadh, 11533, Saudi Arabia*

<sup>2</sup>*Department of Mathematics and Sciences, College of Humanities and Sciences, Prince Sultan University, P.O. Box 66833, Riyadh, 11586, Saudi Arabia;*

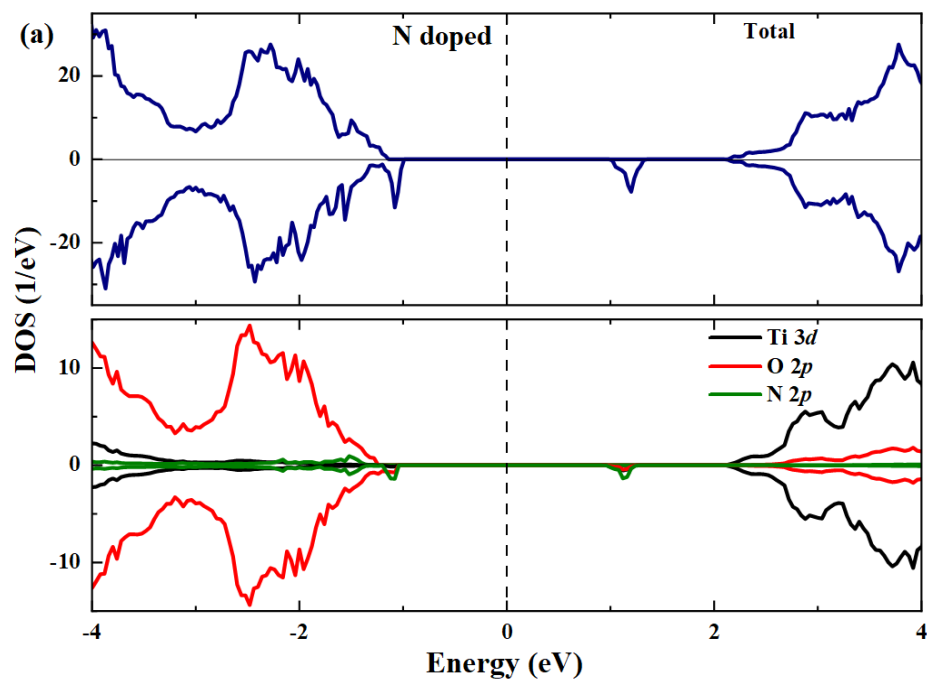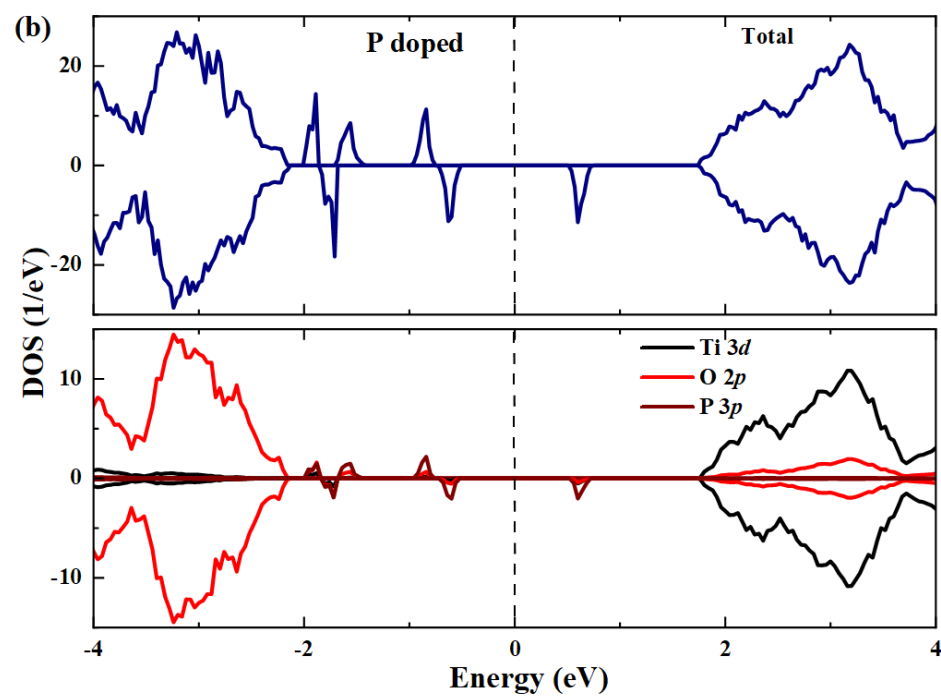

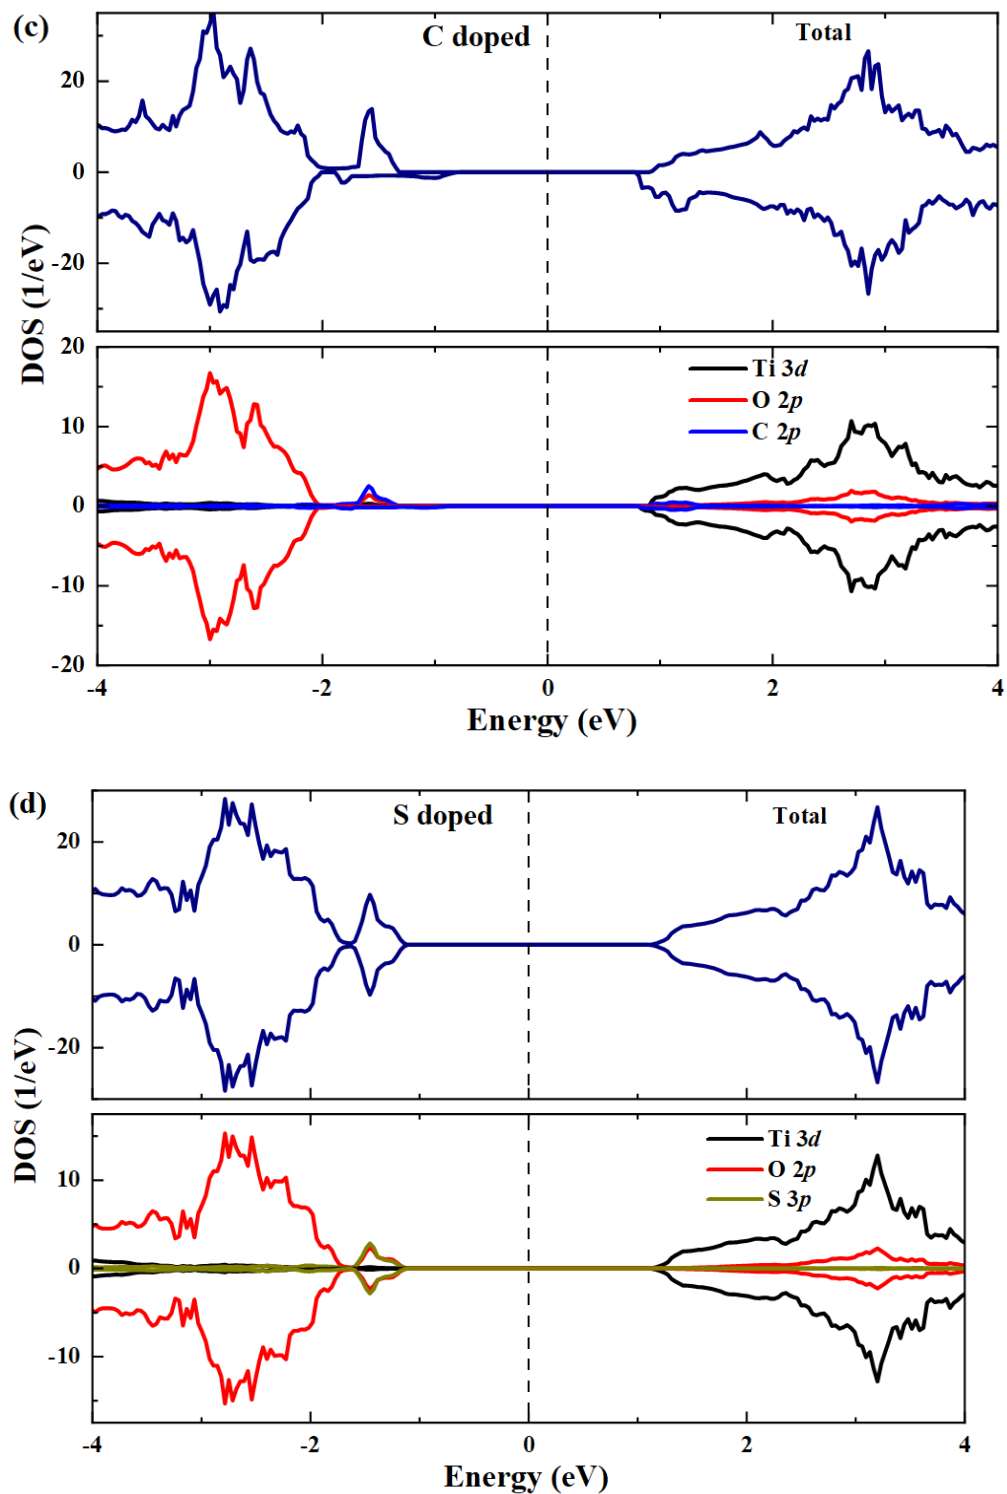

Figure S1. Calculated total and partial DOS of (a) N doped, (b) P doped, (c) C doped and (d) S doped BaTiO<sub>3</sub>. Here, the vertical dashed line denotes the Fermi level

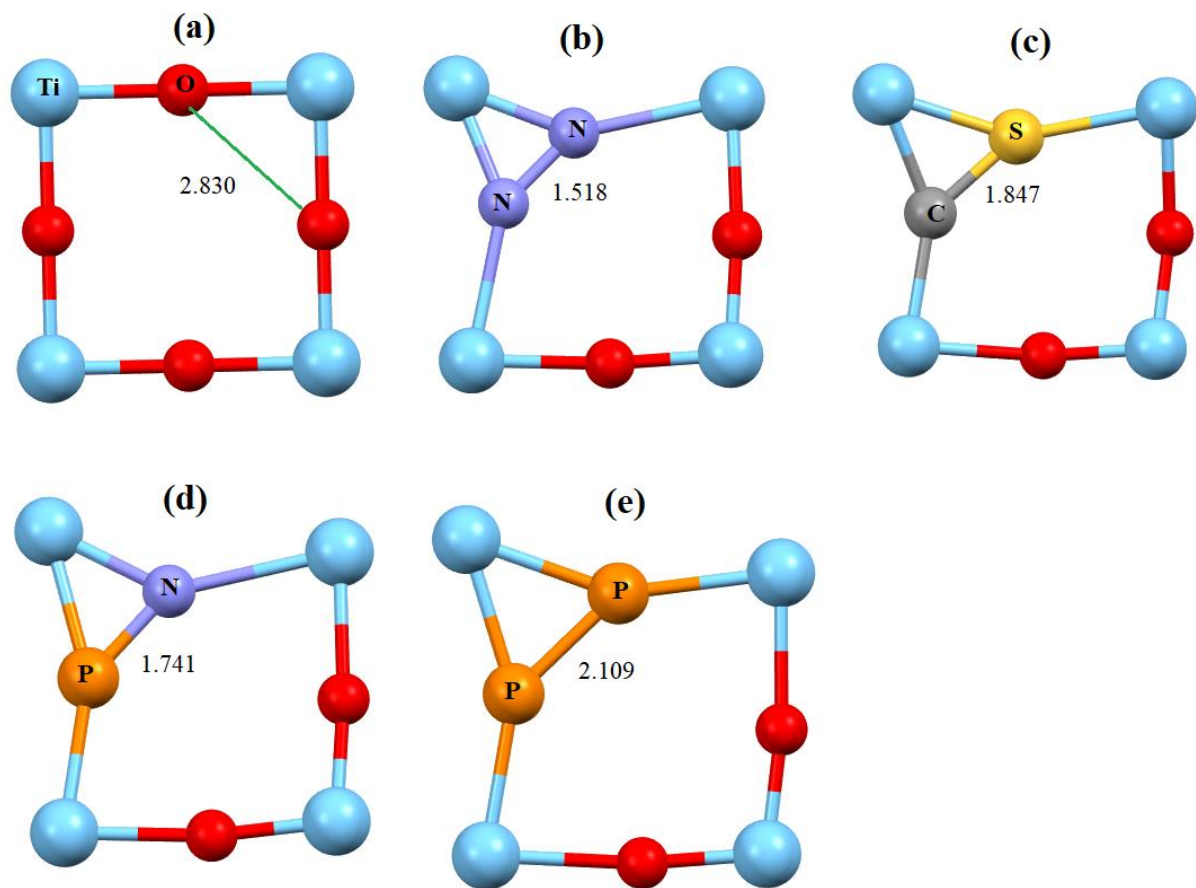

Figure S2. Side view of the optimized structures of (a) pristine, (b) N-N, (c) C-S, (d) N-P and (e) P-P co-doped BaTiO<sub>3</sub>
